# Supplementary material for: Germline Determinants of Humoral Immune Response To HPV-16 Protect Against Oropharyngeal Cancer
Source: Research Square preprint supplement (doi:10.21203/rs.3.rs-121986/v1), 2020-12-28
Supplement: Supplementary file 2 [file 4c2270c6532a3deecbd01098.xlsx]

## Sheet: SuppTable12
	Supplementary Table 12 HPV(-) OPC regional meta-analysis results (P < 5 x10-6 )
	CHR	BPa	SNP	other allele	effect allele	ORb	P	Phet
	12	107976608	rs35189640	C	T	2.7508	1.29e-09	0.9838
	5	162949420	rs729353	T	A	1.398	1.818e-07	0.4076
	5	162949089	rs62394931	C	G	1.3965	1.975e-07	0.3968
	16	7501809	rs146952371	C	T	2.5304	2.111e-07	0.0916
	13	109815112	rs55864736	G	A	1.4547	2.115e-07	0.1035
	3	2905056	rs75622279	G	A	2.0339	2.503e-07	0.31
	5	162939534	rs6874065	G	A	0.7181	2.923e-07	0.3129
	1	17476763	rs12079362	G	A	3.9808	4.131e-07	0.1024
	5	162951982	rs1114752	A	G	0.7231	4.509e-07	0.3319
	16	7505065	rs62017294	C	G	2.4247	4.56e-07	0.1368
	5	162940047	rs12515448	G	A	1.3846	4.647e-07	0.2996
	6	32614094	rs115210925	C	G	1.4611	5.205e-07	0.2664
	16	7508958	rs726475	C	G	0.4166	5.828e-07	0.1594
	1	17484741	rs72909832	T	C	3.8627	6.058e-07	0.0849
	1	17481357	rs57440809	C	T	3.8854	6.101e-07	0.0806
	1	17481197	rs1883911	C	T	3.8651	6.188e-07	0.0849
	1	17485133	rs76002401	T	C	3.8586	6.277e-07	0.0829
	1	17483263	rs57063131	C	T	3.8553	6.402e-07	0.0843
	1	17485762	rs12084773	G	A	3.8448	6.431e-07	0.0834
	1	17488709	rs2454165	T	C	3.8098	7.153e-07	0.0759
	2	153215701	rs72861983	C	T	2.3416	7.205e-07	0.8371
	5	162956281	rs13159242	G	A	1.3809	8.08e-07	0.2029
	1	17472710	rs79514246	G	C	3.7469	8.783e-07	0.1151
	1	17476831	rs12085482	A	G	3.7488	8.817e-07	0.1089
	1	17473781	rs59415835	A	C	3.74	8.951e-07	0.1131
	1	17474148	rs60813664	T	C	3.7383	9.008e-07	0.114
	1	17474464	rs58729513	G	A	3.7383	9.008e-07	0.1143
	1	17474237	rs57548223	C	A	3.738	9.03e-07	0.114
	1	17475302	rs11203313	C	T	3.7379	9.036e-07	0.113
	1	17474938	rs11203312	G	A	3.7373	9.049e-07	0.1147
	5	162944408	rs4869089	G	A	1.3697	9.095e-07	0.2565
	1	17473818	rs60648771	G	A	3.7334	9.273e-07	0.1147
	1	17475475	rs28522699	A	G	3.7326	9.372e-07	0.1139
	5	162948392	rs12515718	T	C	1.3688	9.851e-07	0.2211
	1	17472737	rs10047222	A	G	3.7206	1.001e-06	0.1144
	6	10416134	rs1051512	C	T	2.4436	1.033e-06	0.091
	1	17473323	rs10888005	T	C	3.7085	1.038e-06	0.1146
	1	17472906	rs10047224	A	G	3.7051	1.065e-06	0.1142
	1	17472863	rs10047223	A	G	3.7034	1.071e-06	0.1147
	4	35420953	rs111651905	C	T	2.5501	1.285e-06	0.1759
	12	74501598	rs181745657	T	C	2.9411	1.407e-06	0.9236
	3	166537993	rs77645982	C	T	2.9638	1.578e-06	0.1357
	10	135197376	rs11101731	G	A	1.6023	1.932e-06	0.1283
	10	135197336	rs11101730	A	T	1.6015	1.956e-06	0.1275
	10	135197051	rs11101729	G	A	1.6018	1.971e-06	0.1264
	1	240957393	rs1832905	A	G	1.3843	2.084e-06	0.8261
	1	240955376	rs12411131	G	C	1.3848	2.102e-06	0.8086
	1	240954544	rs10495475	T	C	1.3852	2.116e-06	0.8001
	1	240958615	rs34833519	C	T	1.3837	2.127e-06	0.85
	1	240968334	rs10926355	T	G	1.3852	2.163e-06	0.8793
	1	240953461	rs12047177	G	A	1.3852	2.173e-06	0.7915
	1	240970191	rs4098740	A	G	1.3856	2.178e-06	0.8771
	1	240953257	rs12026244	C	T	1.3852	2.193e-06	0.7897
	10	135200523	rs111485569	C	T	1.6072	2.244e-06	0.1131
	1	240971365	rs16840706	C	T	1.3846	2.325e-06	0.8764
	1	240951919	rs6657339	C	T	1.3844	2.347e-06	0.7792
	15	54473008	rs12593171	G	A	1.3992	2.356e-06	0.3423
	1	240960786	rs12026111	G	A	1.381	2.405e-06	0.8871
	1	240960999	rs12022939	A	G	1.3806	2.446e-06	0.8914
	1	240972742	rs10802908	T	A	1.3804	2.459e-06	0.5693
	1	240961334	rs12034316	C	T	1.3802	2.491e-06	0.8933
	1	240960268	rs12733627	T	G	1.3988	2.496e-06	0.6592
	1	240969897	rs10926357	C	T	1.4015	2.509e-06	0.7152
	1	240964233	rs4603122	G	C	1.3803	2.531e-06	0.8994
	1	240962372	rs3932692	C	A	0.7257	2.75e-06	0.9121
	1	240946291	rs12042174	A	C	1.3802	3.123e-06	0.6998
	6	32620852	rs17612907	G	A	1.4768	3.192e-06	0.7353
	1	165672104	rs77570135	T	G	1.7749	3.193e-06	0.0963
	1	165671663	rs75717581	T	A	1.7794	3.228e-06	0.0953
	15	54470688	rs10459593	A	T	1.3931	3.229e-06	0.3079
	8	90638305	rs150615	A	G	1.3964	3.265e-06	0.3922
	1	240943941	rs35434074	C	T	1.3794	3.291e-06	0.6895
	15	54472362	rs74737798	C	T	1.3927	3.348e-06	0.3176
	15	54472257	rs79755086	C	T	1.3923	3.357e-06	0.3194
	15	54472375	rs76848546	C	T	1.3924	3.387e-06	0.3172
	22	48190727	rs720441	G	C	1.5976	3.483e-06	0.2884
	16	7504615	rs80119450	G	T	2.0507	3.493e-06	0.3795
	12	74476778	rs78411186	G	A	3.4055	3.586e-06	0.6816
	1	240957524	rs1970532	A	C	1.3906	3.619e-06	0.7779
	16	7503827	rs76211373	A	T	2.0481	3.668e-06	0.3771
	2	211348024	rs149882261	A	T	3.0913	3.802e-06	0.7111
	1	240958372	rs61832398	T	C	1.3891	3.868e-06	0.7619
	1	240958479	rs61832399	T	C	1.3891	3.876e-06	0.7609
	1	240954521	rs9287251	A	T	1.3901	3.905e-06	0.7951
	6	32622238	rs17843699	A	G	1.4768	3.993e-06	0.313
	14	23249539	rs12433985	A	G	1.3844	3.994e-06	0.2761
	1	240959190	rs12049199	A	G	1.3885	3.996e-06	0.7459
	1	240959306	rs12022527	T	C	1.3885	3.998e-06	0.7437
	1	240955040	rs1539373	T	C	1.3893	4e-06	0.8239
	4	35497008	rs113244922	C	T	2.3669	4.046e-06	0.1478
	1	240959028	rs12049167	A	C	1.3879	4.1e-06	0.721
	1	240958852	rs12031528	C	T	1.3876	4.159e-06	0.7291
	15	54464459	rs11852494	G	A	1.3876	4.21e-06	0.3338
	1	240956067	rs1342446	T	C	1.3865	4.42e-06	0.7542
	1	240960073	rs6429223	G	A	1.386	4.481e-06	0.7099
	1	240956849	rs1342445	A	G	0.7216	4.521e-06	0.7464
	16	7504546	rs7194484	A	G	0.5832	4.593e-06	0.7497
	1	37937381	rs75778090	C	T	1.5327	4.717e-06	0.9964
	1	37941662	rs41267297	G	A	1.5403	4.753e-06	0.9762
	6	13510019	rs78671973	G	A	2.1118	4.784e-06	0.997
	15	54483834	rs11071055	A	C	1.3833	4.873e-06	0.3416
	7	100510236	rs111276691	C	T	2.2943	4.947e-06	0.821
	1	240960611	rs6663051	A	G	1.3669	4.978e-06	0.8387
	16	7498779	rs9302849	T	G	0.5585	4.989e-06	0.9238
	a SNP position according to NCBI genome build 37 (Hg19)
	b Fixed-effects meta-analysis

## Sheet: SuppTable13
	Supplementary Table 13 HPV(+) OPC regional meta-analysis results (P < 5 x10-6 )
	CHR	BPa	SNP	other allele	effect allele	ORb	P	Phet
	6	31330788	rs9266329	G	A	0.6064	1.203e-12	0.8678
	6	32619654	rs28418426	T	C	1.5588	7.531e-12	0.1897
	6	32626739	rs12055445	A	G	1.4372	6.019e-11	0.5107
	6	31347816	rs4713462	A	G	0.6731	1.317e-10	0.3832
	6	31322047	rs1053726	G	A	0.5619	1.534e-10	0.4836
	6	31347798	rs4713460	G	A	0.6759	1.67e-10	0.362
	6	32636120	rs3828805	T	C	1.5213	5.198e-10	0.1934
	6	32620610	.	D	I	0.4242	1.445e-09	0.7954
	6	32584581	rs73730372	A	G	0.5524	1.73e-09	0.8136
	6	32584977	rs113016235	T	G	0.5554	2.113e-09	0.7648
	6	32608967	rs78496075	A	G	0.4354	2.747e-09	0.8714
	6	32626119	rs28584179	A	G	0.5315	3.116e-09	0.9547
	6	31434334	rs2523679	C	T	0.5079	3.134e-09	0.4061
	6	32596799	.	D	I	0.5333	3.169e-09	0.9981
	6	32592313	rs35224566	G	A	0.5318	3.284e-09	0.9955
	6	32591567	rs73728618	T	A	0.5319	3.308e-09	0.9955
	6	32592068	rs35867827	T	C	0.5319	3.308e-09	0.9955
	6	32591248	rs34967069	C	T	0.4271	3.313e-09	0.9077
	6	32590768	rs34831921	C	A	0.5319	3.315e-09	0.9952
	6	32610300	rs78712211	C	T	0.4338	3.416e-09	0.8821
	6	32593270	rs34720986	G	C	0.5313	3.547e-09	0.9723
	6	32610075	rs35975014	G	A	0.4373	3.734e-09	0.8708
	6	31434801	rs2523677	C	T	0.5062	3.79e-09	0.4356
	6	31328974	rs115497794	G	A	0.5216	3.924e-09	0.6284
	6	31328957	rs116280898	G	C	0.5247	3.98e-09	0.6254
	6	32527363	rs149005573	A	C	0.5248	4.134e-09	0.7293
	6	31343844	rs4959068	T	A	0.4315	4.421e-09	0.9492
	6	31335336	rs17193122	G	A	0.4316	4.444e-09	0.9479
	6	31330105	rs2394989	T	C	0.4319	4.623e-09	0.9469
	6	32594103	rs34518860	G	A	0.5317	4.703e-09	0.9382
	6	31355622	rs73398306	A	G	0.4169	4.887e-09	0.8284
	6	31341286	rs113000567	C	A	0.4345	5.024e-09	0.959
	6	32595857	rs35879651	C	T	0.4032	5.654e-09	0.9943
	6	31349075	rs112367395	G	A	0.4385	6.871e-09	0.9255
	6	32584880	rs73730377	A	G	0.5615	7.327e-09	0.754
	6	32588480	rs115632345	A	T	0.4283	7.498e-09	0.9593
	6	32586507	rs1281933	C	T	0.4297	8.157e-09	0.9934
	6	31359449	rs9368692	G	A	0.4739	8.468e-09	0.2424
	6	31354238	rs12524487	A	G	0.4743	8.705e-09	0.2423
	6	32606742	rs74379225	A	G	0.4303	8.773e-09	0.9665
	6	32596496	rs116489113	A	G	0.4301	8.793e-09	0.9855
	6	32605861	rs34481484	G	A	0.4304	8.827e-09	0.968
	6	32604384	rs62404085	G	A	0.4304	8.831e-09	0.9672
	6	32596985	rs115826298	G	A	0.4302	8.844e-09	0.9859
	6	32587359	rs111294540	C	A	0.4309	9.275e-09	0.9724
	6	32587603	rs34116693	C	T	0.4309	9.287e-09	0.9723
	6	32589544	rs112447098	C	A	0.4309	9.289e-09	0.9724
	6	32589793	rs34135912	G	A	0.4309	9.289e-09	0.9724
	6	32590162	rs35025478	A	G	0.4309	9.289e-09	0.9724
	6	32590187	rs35947801	T	A	0.4309	9.289e-09	0.9724
	6	32584749	rs113177970	C	T	0.431	9.294e-09	0.9724
	6	32582807	rs62406301	A	C	0.431	9.295e-09	0.9724
	6	32583719	rs113676242	C	G	0.431	9.295e-09	0.9724
	6	32583749	rs113468765	G	T	0.431	9.295e-09	0.9724
	6	32584662	rs62406302	T	G	0.431	9.295e-09	0.9724
	6	32585520	rs62406306	T	A	0.431	9.295e-09	0.9725
	6	32585805	rs34692256	G	A	0.431	9.295e-09	0.9724
	6	32587663	rs35390996	G	A	0.431	9.295e-09	0.9724
	6	32587967	rs80257164	C	A	0.431	9.295e-09	0.9724
	6	32588215	rs115076650	A	G	0.431	9.295e-09	0.9724
	6	32588713	rs76815088	T	C	0.431	9.295e-09	0.9724
	6	32589169	rs34645399	G	A	0.431	9.295e-09	0.9724
	6	32590165	rs35786457	G	A	0.431	9.295e-09	0.9724
	6	32591892	rs34412149	A	G	0.4309	9.298e-09	0.9703
	6	32582541	rs62406298	A	G	0.431	9.299e-09	0.9725
	6	32582558	rs62406299	G	C	0.431	9.299e-09	0.9725
	6	32591500	rs112953812	G	A	0.431	9.299e-09	0.9725
	6	32591717	rs114076271	G	A	0.431	9.301e-09	0.9725
	6	32587618	rs36232342	T	C	0.431	9.305e-09	0.9724
	6	32574983	rs139957660	G	A	0.2394	9.341e-09	0.4821
	6	32598356	rs115527034	T	C	0.431	9.377e-09	0.973
	6	32598680	rs151002495	G	A	0.431	9.382e-09	0.973
	6	32595141	rs116831885	C	T	0.4306	1.014e-08	0.994
	6	31328860	rs115860766	C	T	0.5385	1.021e-08	0.6072
	6	32593040	rs78390183	C	T	0.4317	1.023e-08	0.9817
	6	32620572	rs17612852	G	A	1.4817	1.081e-08	0.0507
	6	32582772	rs62406300	A	G	0.433	1.158e-08	0.9217
	6	31347802	rs4713461	A	G	0.4423	1.244e-08	0.9098
	6	32682862	rs3892710	C	T	0.6484	1.377e-08	0.1369
	6	32612417	rs62404117	A	G	0.4265	1.385e-08	0.7664
	6	32610976	rs9492	A	C	0.5102	1.691e-08	0.9983
	6	32672214	rs62406889	G	T	0.4479	1.691e-08	0.3611
	6	32585843	rs28383263	C	G	0.4403	1.759e-08	0.96
	6	31329004	rs114708313	A	T	0.5144	2.001e-08	0.7587
	6	32567551	rs112481371	A	G	0.4852	2.089e-08	0.8731
	6	32567784	rs62405652	A	C	0.4852	2.096e-08	0.8727
	6	32598813	rs548102104	G	A	0.2974	2.145e-08	0.7438
	6	32633287	rs28746817	C	T	1.4629	2.43e-08	0.3433
	6	31327701	rs9378249	T	G	0.4673	2.556e-08	0.3809
	6	32627561	rs9273440	T	C	1.4741	2.805e-08	0.0823
	6	31324448	rs17881210	G	A	0.4896	2.967e-08	0.401
	6	32589234	.	D	I	0.4484	3.083e-08	0.9959
	6	31329062	rs34087996	A	C	0.5141	3.35e-08	0.7359
	6	32598028	rs146668528	C	T	0.4096	3.437e-08	0.9591
	6	32592793	rs566952760	C	T	0.4344	3.567e-08	0.9593
	6	32630096	rs9274063	G	A	1.6781	4.785e-08	0.6603
	6	32588842	rs114014117	A	G	0.3529	4.818e-08	0.8788
	6	31322487	rs3819294	A	G	0.5128	4.843e-08	0.3679
	6	31366295	rs9394070	C	A	0.4763	5.475e-08	0.1666
	6	31370367	rs3763288	G	A	0.4767	5.589e-08	0.1668
	6	31375917	rs114202986	T	C	0.4768	5.59e-08	0.1679
	6	32589374	rs144081603	T	C	0.435	5.658e-08	0.9399
	6	31377975	rs28436034	A	G	0.6852	6.328e-08	0.1606
	6	31324348	rs4999717	C	T	0.5138	6.462e-08	0.3535
	6	31326292	rs9405085	A	G	0.5138	6.47e-08	0.352
	6	31323721	rs12526858	G	C	0.513	6.713e-08	0.3622
	6	31323725	rs12528645	T	C	0.513	6.736e-08	0.3625
	6	31392906	rs2524279	G	A	0.4811	6.75e-08	0.1701
	6	32608425	rs34430979	A	C	0.4515	7.005e-08	0.691
	6	31400292	rs2516471	G	A	0.4844	7.752e-08	0.2017
	6	31401466	rs2263323	C	T	0.4846	7.807e-08	0.2015
	6	31405617	rs2596466	T	C	0.4846	7.813e-08	0.2014
	6	31328475	rs9380248	C	T	0.5147	7.873e-08	0.4188
	6	31349120	rs9266703	G	A	0.5771	7.911e-08	0.4606
	6	31328545	rs9366782	A	T	0.515	8.033e-08	0.4157
	6	31380897	rs9357133	C	T	0.485	8.287e-08	0.2013
	6	31347201	rs9266642	C	T	0.578	8.368e-08	0.4595
	6	31348543	rs9266688	G	A	0.578	8.372e-08	0.4595
	6	31350463	rs9266729	A	G	0.5784	8.73e-08	0.4427
	6	31352880	rs9266774	A	G	0.5785	8.733e-08	0.4427
	6	31353417	rs9266775	A	G	0.5785	8.767e-08	0.4431
	6	31426399	rs2523684	A	G	0.485	8.907e-08	0.2121
	6	31320397	rs113274764	C	T	0.536	9.191e-08	0.9555
	6	31349030	rs9266701	G	T	0.5789	9.345e-08	0.4474
	6	31379391	rs3828879	C	T	0.6249	9.454e-08	0.7892
	6	31350380	rs4293988	A	C	0.5808	9.516e-08	0.5106
	6	31351313	rs9266749	C	T	0.5808	9.516e-08	0.5106
	6	31349922	rs9266722	C	T	0.5807	9.62e-08	0.5132
	6	32597429	rs533111599	T	C	0.3805	1.038e-07	0.7305
	6	32556378	rs9270207	C	T	0.6277	1.132e-07	0.512
	6	31416990	rs2524280	A	C	0.4873	1.134e-07	0.226
	6	31378335	rs9380254	G	C	0.4888	1.156e-07	0.196
	6	31347566	rs2244027	A	G	0.7112	1.242e-07	0.7599
	6	32583900	rs112648389	A	G	0.4314	1.259e-07	0.9844
	6	31351675	rs9266766	G	C	0.5825	1.275e-07	0.4732
	6	31320274	rs113121477	A	G	0.4695	1.277e-07	0.6799
	4	183255689	rs1516535	G	C	1.427	1.329e-07	0.8232
	3	166742591	rs9836282	T	C	0.7541	1.341e-07	0.0296
	6	32624874	rs28483633	C	A	1.5292	1.343e-07	0.9166
	6	31324955	rs34437781	C	T	0.4721	1.363e-07	0.6444
	3	166746608	rs1356768	G	A	0.7548	1.397e-07	0.0325
	4	183255693	rs1516534	A	C	1.426	1.404e-07	0.8338
	6	32596878	rs114786106	A	G	0.5141	1.495e-07	0.8723
	6	32674059	rs3134968	A	G	0.73	1.788e-07	0.1196
	6	31370329	rs3763287	C	A	0.4981	1.865e-07	0.1603
	6	32637418	rs17205647	A	G	1.3589	2.037e-07	0.7354
	6	32627773	rs1049213	A	G	1.4307	2.102e-07	0.0706
	6	31319872	rs58264607	C	A	0.5718	2.219e-07	0.8786
	6	31321249	rs116633868	A	T	0.4679	2.266e-07	0.6803
	6	32648719	rs3129782	G	A	1.4293	2.485e-07	0.0847
	6	32652581	rs3134975	T	C	1.4285	2.653e-07	0.103
	6	32680122	rs3135461	G	A	1.4382	2.684e-07	0.0334
	6	32663631	rs3129720	T	C	1.4279	2.733e-07	0.1069
	6	32623584	.	C	T	1.4772	2.743e-07	0.6525
	6	32661779	rs3129719	T	G	1.4278	2.744e-07	0.1068
	6	32496974	rs181619944	A	G	0.5073	2.851e-07	0.8428
	4	183256271	rs72698100	T	A	0.6976	2.939e-07	0.8587
	6	32635846	rs9274614	C	G	1.4264	2.963e-07	0.1049
	4	183256377	rs112500619	C	T	0.6977	2.98e-07	0.8593
	4	183255636	rs1516536	T	G	1.3897	3.097e-07	0.9777
	6	32637680	rs3134994	T	C	1.4253	3.132e-07	0.1031
	6	32652305	rs3134976	A	C	1.4249	3.201e-07	0.1024
	6	32612251	rs9273071	T	G	1.4803	3.309e-07	0.1704
	6	31435833	rs2244546	C	G	0.5805	3.407e-07	0.2989
	4	183253777	rs10020064	G	A	0.6991	3.417e-07	0.8617
	6	31325684	rs34265426	A	C	0.5064	3.493e-07	0.225
	6	31338528	rs9295986	A	G	0.7138	3.689e-07	0.8206
	4	183252755	rs2063907	A	G	1.3853	3.964e-07	0.9926
	6	32658624	rs2157051	G	A	1.4514	3.974e-07	0.065
	6	32583255	rs13208475	C	T	1.404	3.998e-07	0.9685
	6	32583274	rs13208697	A	C	1.404	3.998e-07	0.9685
	6	32565716	rs113690616	G	T	0.4649	4.125e-07	0.9115
	6	32568709	rs181584777	G	A	0.3982	4.28e-07	0.9713
	6	32619147	rs545686632	G	A	1.4951	4.418e-07	0.7959
	6	31319521	rs114945721	A	G	0.4702	4.491e-07	0.6231
	6	32608931	rs9272679	T	C	1.374	4.518e-07	0.202
	4	183253743	rs6853681	A	G	1.3763	4.595e-07	0.786
	6	32605295	rs1129735	C	T	1.3679	4.595e-07	0.0378
	6	32556499	rs28724207	G	A	1.5162	4.655e-07	0.1961
	4	183252977	rs9790638	G	A	1.3743	5.138e-07	0.7951
	6	31320849	rs35735140	G	A	0.5078	5.147e-07	0.4431
	4	183256229	rs4266329	T	C	1.3739	5.159e-07	0.7968
	4	183253490	rs2309684	G	A	1.3738	5.283e-07	0.7999
	6	32634387	rs1049055	G	A	0.7062	5.584e-07	0.1127
	6	31328944	rs115457991	G	A	0.3859	5.646e-07	0.9898
	6	32670136	rs3135001	T	C	1.4151	5.694e-07	0.0865
	6	32627747	rs1049225	A	G	0.7067	5.839e-07	0.1107
	6	32667946	rs3135190	T	G	1.4143	5.841e-07	0.08
	6	32634010	rs3830058	G	A	1.4149	5.88e-07	0.1109
	6	32634403	.	I	D	0.707	6.077e-07	0.119
	6	32630916	rs281863525	G	T	1.4187	6.155e-07	0.1363
	6	32615446	rs17612562	T	G	1.3607	6.232e-07	0.5543
	6	31328636	rs147412087	C	T	0.5463	6.789e-07	0.9154
	4	183257084	rs34900572	G	T	0.7208	6.905e-07	0.9463
	6	32627434	rs9273426	A	C	1.3615	6.976e-07	0.6849
	6	32585500	rs28383249	C	T	1.521	7.063e-07	0.9946
	6	32585058	rs28752533	A	G	1.4635	7.327e-07	0.8453
	4	183257009	rs7669247	A	G	1.3521	7.593e-07	0.6028
	6	32636040	rs9274626	T	C	1.4061	7.702e-07	0.1203
	6	32672089	rs3134995	A	G	0.7098	7.928e-07	0.0933
	6	32561887	rs28366333	G	C	1.4685	8.012e-07	0.063
	6	32694784	rs9276016	G	C	1.3617	8.262e-07	0.0782
	6	32580999	rs12205706	C	T	1.538	8.315e-07	0.8934
	6	31323567	rs4081560	G	A	0.652	8.331e-07	0.7805
	6	31378117	rs17200109	C	T	0.4952	9.257e-07	0.3136
	6	32631866	rs9274295	A	G	0.6674	9.507e-07	0.0932
	6	32668439	rs3135002	A	C	1.4352	9.641e-07	0.055
	4	183251534	rs13129891	T	C	0.7063	9.77e-07	0.7865
	4	183256047	rs28437436	C	G	0.7062	9.864e-07	0.8279
	6	32581491	rs10947320	C	T	1.5074	1.006e-06	0.9973
	6	32605067	rs28383344	C	G	1.4422	1.01e-06	0.4915
	6	32568127	rs28752491	G	C	1.4812	1.012e-06	0.6904
	6	31325478	rs116138399	G	C	0.5505	1.028e-06	0.6797
	6	32479729	rs146486595	T	A	0.383	1.033e-06	0.7757
	6	158030721	rs142170828	G	A	1.6965	1.041e-06	0.3456
	6	158027884	rs150070545	C	T	1.692	1.157e-06	0.3608
	6	32557163	rs113650892	C	A	1.6624	1.169e-06	0.7896
	6	31326203	rs4947313	G	T	0.3951	1.195e-06	0.6832
	6	32634302	rs1049062	A	G	1.4015	1.205e-06	0.12
	3	166762576	rs11717710	G	A	0.7649	1.223e-06	0.038
	6	32585007	rs28752528	G	T	1.5328	1.25e-06	0.9206
	4	183255537	rs35789608	A	G	0.709	1.278e-06	0.8158
	6	32552029	rs17884945	A	T	1.3932	1.305e-06	0.5837
	4	183266739	rs7699524	C	T	0.7104	1.356e-06	0.8699
	4	183254804	rs13125392	G	A	1.3608	1.433e-06	0.8081
	4	183257462	rs7670222	C	T	1.341	1.439e-06	0.6905
	6	32565169	rs28366359	C	T	1.4881	1.475e-06	0.7917
	6	31322340	rs3926873	G	A	0.5557	1.509e-06	0.6938
	6	31323875	rs41560220	C	T	0.5561	1.537e-06	0.694
	6	31322803	rs17193040	G	T	0.5561	1.543e-06	0.695
	6	32571897	rs12211942	A	G	1.3761	1.55e-06	0.108
	6	31321587	rs3997995	C	T	0.5562	1.552e-06	0.6941
	6	31323203	rs1050823	A	G	0.5556	1.562e-06	0.6921
	6	32636543	rs9274666	A	G	0.7657	1.59e-06	0.1442
	6	32614749	rs17612489	T	A	1.3465	1.611e-06	0.4301
	17	40536396	rs8070763	T	C	0.7607	1.614e-06	0.9432
	17	40535184	rs12942611	C	A	0.7612	1.673e-06	0.9436
	6	31238925	rs141142418	A	G	0.3863	1.694e-06	0.7095
	6	32626537	rs28672722	G	T	0.7187	1.706e-06	0.7558
	6	31323885	rs41549217	A	C	0.4008	1.751e-06	0.7064
	6	158026366	rs140840114	T	C	1.6769	1.802e-06	0.3424
	6	31360602	rs116562707	A	G	0.4112	1.833e-06	0.9834
	6	31352818	rs118061248	A	G	0.409	1.869e-06	0.9979
	6	32584625	rs3129758	A	G	1.3398	1.879e-06	0.1668
	6	32609181	rs1129765	C	T	1.4731	1.897e-06	0.7585
	17	40531761	rs7219739	G	T	0.7633	1.979e-06	0.879
	6	158013897	rs111339992	G	A	1.6731	2.049e-06	0.6211
	6	31424607	rs3093971	G	A	0.627	2.059e-06	0.3032
	5	3813000	rs10072600	G	A	0.7687	2.089e-06	0.8007
	6	32657505	rs4538748	T	C	1.3215	2.096e-06	0.9191
	6	32585489	rs28383248	G	A	1.6625	2.159e-06	0.8373
	6	32620469	rs17612816	T	G	1.3263	2.223e-06	0.4572
	2	138042940	rs2573093	T	C	0.7456	2.299e-06	0.7322
	6	32588104	rs200991817	C	T	0.0829	2.311e-06	0.7242
	6	32558084	rs28366235	G	A	1.4889	2.315e-06	0.9809
	6	31295891	rs115301069	C	T	0.4921	2.334e-06	0.6607
	6	31390239	rs114869225	G	A	0.4166	2.343e-06	0.9252
	6	31379168	rs3828875	C	T	0.4162	2.378e-06	0.927
	6	31372474	rs116975856	G	C	0.4157	2.401e-06	0.9458
	17	40530895	rs8071537	G	T	0.7654	2.426e-06	0.894
	17	40498273	rs3816769	G	A	0.7665	2.43e-06	0.8558
	6	32626899	rs4713571	G	T	1.3388	2.448e-06	0.6921
	6	32588088	rs116654558	C	T	0.0828	2.51e-06	0.7247
	6	32636756	rs2858302	G	A	1.2912	2.551e-06	0.4851
	1	23858002	rs2742976	T	G	0.769	2.595e-06	0.3765
	2	86464104	rs10206710	G	A	0.7834	2.641e-06	0.9452
	17	40504250	rs62075772	A	G	0.7673	2.671e-06	0.8705
	17	40505134	rs8076051	A	G	0.7673	2.673e-06	0.8713
	6	30138162	rs1029239	C	G	1.2904	2.691e-06	0.9276
	5	3831508	rs2932327	A	G	0.7729	2.717e-06	0.6237
	17	40498944	rs17885741	T	C	0.7675	2.725e-06	0.8642
	6	29927722	rs2571400	C	G	1.2905	2.726e-06	0.8924
	17	40496163	rs17886724	A	G	0.7672	2.765e-06	0.8578
	5	3835881	rs1873220	T	A	0.7722	2.771e-06	0.5771
	17	40496024	rs7217655	C	T	0.7673	2.796e-06	0.8568
	17	40543992	rs4796647	G	A	1.305	2.819e-06	0.9941
	17	40495390	rs8072391	G	A	0.7673	2.831e-06	0.8544
	6	32649676	rs9275109	G	T	1.3358	2.844e-06	0.2009
	17	40496594	rs12950549	A	G	0.7676	2.849e-06	0.8532
	6	31377587	rs12175489	A	G	0.6549	2.965e-06	0.3588
	17	40532701	rs8068748	T	C	0.7676	2.98e-06	0.9684
	4	183259871	rs28708935	C	T	0.7208	3.042e-06	0.8663
	5	3828209	rs2967813	A	G	0.7739	3.105e-06	0.6378
	6	32580928	rs12192221	A	G	1.4426	3.157e-06	0.9281
	6	31321519	rs2395474	A	G	0.5645	3.169e-06	0.8006
	6	32603897	rs28383338	G	A	1.4354	3.177e-06	0.9191
	5	3834603	rs2963794	G	A	0.7748	3.195e-06	0.5773
	6	32607872	rs28383399	A	G	1.4353	3.208e-06	0.9292
	6	32609173	rs10093	C	G	1.296	3.224e-06	0.2596
	5	3833737	rs1319962	G	A	0.7747	3.253e-06	0.5882
	6	32609038	rs28383438	C	T	1.4349	3.262e-06	0.9267
	6	32609046	rs28383440	C	T	1.4349	3.264e-06	0.9267
	6	31356943	rs2904598	A	T	0.6621	3.288e-06	0.6618
	6	32605825	rs28383348	G	A	1.4345	3.3e-06	0.9223
	6	32610277	rs28383466	A	G	1.4344	3.333e-06	0.9299
	6	32573950	rs2647072	G	T	1.4413	3.346e-06	0.9558
	6	32591368	rs28383320	T	C	1.4344	3.356e-06	0.9231
	6	32590352	rs28383318	G	T	1.4345	3.37e-06	0.926
	6	32611068	rs707947	A	G	1.443	3.427e-06	0.9453
	6	32587281	rs28383315	A	G	1.4335	3.443e-06	0.9174
	1	23884661	rs1050096	G	A	1.2812	3.465e-06	0.3617
	6	32447074	rs29001517	C	A	1.465	3.468e-06	0.761
	17	40507980	rs9891119	A	C	0.7703	3.498e-06	0.9494
	6	32591038	rs28383319	A	G	1.4332	3.514e-06	0.9212
	6	32510012	rs57588792	A	G	1.3531	3.521e-06	0.1454
	6	32627386	rs12918	C	T	1.3249	3.525e-06	0.905
	6	32614691	rs12190291	G	A	1.4341	3.587e-06	0.9881
	6	32576036	rs12206257	C	T	1.4326	3.603e-06	0.9226
	6	31394898	rs116307838	G	C	0.4162	3.616e-06	0.9597
	6	32574991	rs13193798	G	A	1.4328	3.637e-06	0.9307
	6	32635312	rs9274579	A	G	0.7214	3.637e-06	0.1508
	5	3820906	rs7706463	G	T	0.7751	3.653e-06	0.6885
	5	3820935	rs7731170	T	C	0.7751	3.67e-06	0.6874
	6	32541698	rs116496280	C	A	1.378	3.792e-06	0.1096
	6	32600340	rs28383330	A	G	1.4312	3.81e-06	0.9377
	6	32601462	rs2395520	A	G	1.4312	3.81e-06	0.9377
	6	32602285	rs17211475	A	G	1.4311	3.812e-06	0.9376
	6	32552095	rs17885382	C	T	1.6373	3.818e-06	0.8914
	6	32577847	rs13206219	G	T	1.4305	3.912e-06	0.9314
	6	32580703	rs12192104	A	C	1.4304	3.92e-06	0.9316
	6	32578100	rs13206639	A	G	1.4304	3.923e-06	0.9317
	6	32570439	rs2647063	G	C	1.4301	3.939e-06	0.8845
	6	31371577	rs17206455	G	C	0.4181	3.943e-06	0.9018
	2	86463063	rs12714178	G	A	0.7842	3.956e-06	0.8049
	17	40519890	rs957970	A	G	0.7713	3.959e-06	0.9646
	6	32491951	rs146002960	A	C	1.4745	3.969e-06	0.9195
	6	32518996	rs80250300	C	A	1.3294	3.978e-06	0.0448
	5	3836039	rs2967814	G	C	0.7757	3.982e-06	0.5835
	6	32569667	rs2647060	G	T	1.4299	3.993e-06	0.8852
	6	31346805	rs9266627	G	A	1.3019	4.006e-06	0.7117
	17	40521204	rs35840966	C	T	0.7715	4.032e-06	0.966
	5	3812991	rs11745339	T	A	0.775	4.068e-06	0.8717
	6	32626702	rs35779483	A	G	1.3129	4.165e-06	0.7471
	5	3817725	rs7727954	G	A	0.7767	4.357e-06	0.7179
	6	31385782	rs2596529	A	T	0.6211	4.371e-06	0.2282
	6	32625209	.	C	T	1.3376	4.385e-06	0.2184
	6	31397658	rs2516451	A	G	0.6211	4.41e-06	0.1815
	6	31398784	rs2524278	C	T	0.6218	4.51e-06	0.1773
	6	31392308	rs2596468	A	G	0.6218	4.519e-06	0.1772
	6	32653676	rs9275168	A	G	0.7568	4.539e-06	0.142
	6	32626130	rs7744020	A	G	1.31	4.568e-06	0.6953
	6	32572666	rs2858869	G	A	1.4284	4.61e-06	0.8474
	6	32561880	rs28366331	T	G	1.4005	4.62e-06	0.1246
	6	32592582	rs9271657	T	C	0.6637	4.627e-06	0.7907
	6	32409996	rs6911777	T	C	1.5531	4.64e-06	0.7997
	6	32410087	rs16822618	T	C	1.5531	4.641e-06	0.8
	6	32658310	rs9469220	G	A	0.7753	4.735e-06	0.9737
	17	40534075	rs7211777	G	A	1.2959	4.754e-06	0.982
	2	71734274	rs11686031	A	G	1.3192	4.76e-06	0.8562
	6	32565979	rs28383172	A	G	1.426	4.847e-06	0.8773
	6	32561137	rs28366311	C	G	1.4452	4.875e-06	0.4586
	6	32654174	rs9275177	G	A	0.7514	4.885e-06	0.1972
	6	32653018	rs28371251	T	C	1.3128	4.987e-06	0.6596
	a SNP position according to NCBI genome build 37 (Hg19)
	b Fixed-effects meta-analysis

## Sheet: SuppTable14
	Supplementary Table 14 pooled HPV(-)OPC and OC results ( P < 5 x10-6 )
	CHR	BPa	SNP	other allele	effect allele	ORb	P	Phet
	6	32636120	rs3828805	T	C	1.2999	2.506e-09	0.7098
	6	32587300	rs9271378	A	G	1.2276	7.349e-09	0.9299
	15	49829019	rs10851478	G	A	1.2184	1.293e-08	0.1784
	15	49785916	rs12910284	A	G	1.2181	1.5e-08	0.175
	15	49774963	rs11852293	A	G	1.2182	1.543e-08	0.1744
	6	32627561	rs9273440	T	C	1.2885	2.712e-08	0.2765
	4	100239319	rs1229984	A	G	0.5916	4.132e-08	0.1137
	15	49998682	rs692309	T	C	0.8152	4.527e-08	0.2546
	10	126157446	rs201982221	D	I	1.7449	4.82e-08	0.2844
	5	1343794	rs10462706	C	T	0.7593	5.013e-08	0.8047
	6	32627773	rs1049213	A	G	1.2784	5.751e-08	0.293
	12	107976608	rs35189640	C	T	1.7894	7.517e-08	0.5436
	15	49977088	rs1507618	A	C	1.2166	8.93e-08	0.2639
	6	32630916	rs281863525	G	T	1.28	9.531e-08	0.5803
	6	29943715	rs3823363	G	A	0.8222	1.16e-07	0.7922
	6	32636543	rs9274666	A	G	0.8229	1.203e-07	0.7061
	6	32658624	rs2157051	G	A	1.2896	1.232e-07	0.8128
	9	22064465	rs8181047	A	G	1.2167	1.319e-07	0.1507
	15	50002461	rs1484553	T	G	1.2181	1.476e-07	0.2574
	6	32677846	rs4947344	A	G	0.803	1.559e-07	0.4972
	15	49813497	rs1395903	G	T	1.2057	1.597e-07	0.0616
	6	32631866	rs9274295	A	G	0.7525	1.613e-07	0.2382
	6	32668439	rs3135002	A	C	1.289	1.618e-07	0.7127
	6	32581582	rs9271300	C	G	1.2078	1.74e-07	0.5948
	9	22059905	rs10757268	T	C	0.8227	1.75e-07	0.2369
	9	22060136	rs2095144	A	G	0.8231	1.86e-07	0.2273
	15	49824761	rs17402115	C	T	1.2037	1.975e-07	0.071
	6	32647701	rs3129780	T	A	1.2433	2.009e-07	0.6016
	6	32634387	rs1049055	G	A	0.7884	2.011e-07	0.3587
	15	49815650	rs1818308	T	A	1.2037	2.014e-07	0.069
	6	32634010	rs3830058	G	A	1.2682	2.018e-07	0.3361
	15	49806402	rs2413956	G	A	1.2037	2.042e-07	0.0658
	6	32627747	rs1049225	A	G	0.789	2.158e-07	0.3327
	15	49816682	rs12907918	G	A	1.2026	2.308e-07	0.0716
	6	32670136	rs3135001	T	C	1.2668	2.332e-07	0.6225
	15	49796697	rs34246470	C	T	1.2021	2.465e-07	0.065
	15	49797933	rs12908624	G	A	1.2021	2.475e-07	0.0657
	15	49797119	rs35698479	A	G	1.202	2.494e-07	0.0654
	15	49771977	rs62009977	A	C	1.2027	2.55e-07	0.061
	6	32667946	rs3135190	T	G	1.2657	2.579e-07	0.6468
	15	49791951	rs11858411	A	G	1.2019	2.593e-07	0.0608
	6	32635846	rs9274614	C	G	1.264	2.597e-07	0.5409
	15	49770616	rs4436732	G	A	1.2026	2.616e-07	0.0605
	15	49766968	rs2899434	G	A	1.2026	2.625e-07	0.062
	15	49790877	rs34146550	T	C	1.2018	2.625e-07	0.0624
	15	49789971	rs55904469	G	A	1.2017	2.653e-07	0.062
	15	49831894	rs34694913	G	T	1.2009	2.653e-07	0.0548
	15	49830708	rs1911612	G	A	1.2009	2.659e-07	0.0549
	15	49765426	rs11854671	C	T	1.2025	2.694e-07	0.0615
	6	32634403	rs71789649	I	D	0.7906	2.739e-07	0.3425
	6	32652581	rs3134975	T	C	1.2634	2.743e-07	0.5689
	15	49770806	rs12593151	C	T	1.202	2.759e-07	0.0633
	15	49835588	rs11855173	G	A	1.2006	2.796e-07	0.0543
	9	22077543	rs1412832	G	A	1.2098	2.812e-07	0.0549
	6	32663631	rs3129720	T	C	1.2628	2.856e-07	0.538
	6	32661779	rs3129719	T	G	1.2628	2.861e-07	0.5376
	15	49832378	rs12232355	A	G	1.2002	2.894e-07	0.0552
	15	49783775	rs34414487	A	G	1.2011	2.947e-07	0.0598
	15	49839116	rs11638200	A	G	1.2003	2.99e-07	0.0538
	15	49781725	rs4547278	C	T	1.201	3.02e-07	0.059
	15	49757108	rs12595692	C	T	1.2015	3.065e-07	0.0582
	15	49756081	rs12148764	A	T	1.2013	3.127e-07	0.0578
	6	32637680	rs3134994	T	C	1.2618	3.142e-07	0.527
	15	49755842	rs4480740	G	A	1.2013	3.144e-07	0.0577
	15	49755442	rs7174135	T	A	1.2012	3.176e-07	0.0574
	15	49773591	rs34002493	C	T	1.2008	3.176e-07	0.0595
	15	49758729	rs6493372	T	C	1.2012	3.182e-07	0.0559
	15	49843747	rs11854568	T	C	1.2	3.203e-07	0.0534
	15	49753532	rs17479589	T	C	1.2011	3.21e-07	0.0575
	15	49845296	rs11070706	T	C	1.1999	3.273e-07	0.0532
	9	133962573	rs77452476	T	G	1.2859	3.289e-07	0.9475
	6	32672089	rs3134995	A	G	0.7918	3.344e-07	0.6426
	15	49873811	rs62022665	G	C	1.204	3.357e-07	0.0611
	6	32652305	rs3134976	A	C	1.2609	3.417e-07	0.5194
	6	32634302	rs1049062	A	G	1.2626	3.484e-07	0.3656
	15	49880905	rs12901680	T	C	1.2043	3.489e-07	0.0612
	15	49849674	rs1395901	C	T	1.1997	3.532e-07	0.0526
	6	32636040	rs9274626	T	C	1.2592	3.683e-07	0.4651
	15	49995341	rs55968860	G	T	1.2179	3.804e-07	0.0985
	15	49855920	rs12908635	A	G	1.1998	3.87e-07	0.0523
	15	49883343	rs62022667	G	C	1.2037	3.873e-07	0.0597
	15	49858901	rs12906972	T	C	1.1999	4.068e-07	0.0524
	15	49871503	rs4775816	A	C	1.2015	4.183e-07	0.0467
	6	32633809	rs9274483	T	C	1.2554	4.214e-07	0.169
	15	49869141	rs12912703	C	G	1.2009	4.307e-07	0.0454
	6	32619654	rs28418426	T	C	1.2381	4.322e-07	0.7011
	22	21231861	rs150481896	G	A	2.1705	4.415e-07	0.8768
	15	49905410	rs7162741	A	G	1.2048	4.527e-07	0.0609
	15	49906971	rs12907944	G	A	1.2046	4.753e-07	0.0578
	15	49817864	rs62010017	T	C	1.1909	4.83e-07	0.5363
	15	49909741	rs10851479	C	T	1.2043	5.036e-07	0.0598
	15	49925041	rs12902960	T	C	1.2056	5.088e-07	0.0585
	15	49922775	rs7172906	C	G	1.2054	5.156e-07	0.0586
	6	32648719	rs3129782	G	A	1.256	5.211e-07	0.4736
	15	49916655	rs925104	T	G	1.2046	5.289e-07	0.0587
	15	49997216	rs11634947	C	G	1.2137	5.687e-07	0.0554
	6	32620572	rs17612852	G	A	1.2457	5.769e-07	0.3645
	22	49358321	rs11705249	G	T	1.5183	5.839e-07	0.7209
	15	49929664	rs8032688	A	G	1.2044	6.187e-07	0.0583
	15	49993143	rs11639326	G	C	1.2113	6.258e-07	0.0776
	15	49992862	rs28819483	G	A	1.2112	6.293e-07	0.0783
	15	49945675	rs12591317	A	G	1.2054	6.366e-07	0.0585
	15	49933823	rs12591659	G	A	1.2044	6.384e-07	0.0598
	15	49948824	rs11852336	T	C	1.2051	7.01e-07	0.0619
	15	49872585	rs8027730	C	A	1.1878	7.11e-07	0.552
	2	218270810	rs1479575211	D	I	0.7706	7.305e-07	0.4389
	15	49872347	rs7161744	A	C	1.1873	7.494e-07	0.5322
	15	49794020	rs7169799	T	C	1.1848	7.526e-07	0.5068
	15	49793030	rs11070697	G	A	1.1847	7.623e-07	0.5041
	15	49891094	rs11632201	T	C	1.1887	7.695e-07	0.5284
	9	133953882	rs199717881	C	A	1.3044	7.814e-07	0.8385
	9	22050898	rs944800	A	G	1.199	7.977e-07	0.0496
	2	72085791	rs10206237	A	G	0.7366	8.373e-07	0.218
	15	49834746	rs11854203	C	A	1.1836	8.56e-07	0.4594
	15	49969620	rs12906134	G	T	1.2053	8.562e-07	0.0646
	15	49871878	rs12899680	C	G	1.1859	8.796e-07	0.4823
	6	32630509	rs281863802	A	G	0.8329	8.827e-07	0.2917
	15	50000272	rs7180421	C	T	1.2105	8.978e-07	0.1042
	15	50004083	rs17404727	T	C	1.2105	9.148e-07	0.1031
	6	32627082	rs9273394	A	G	0.8135	9.305e-07	0.5606
	15	50002399	rs62022700	A	G	1.21	9.595e-07	0.1032
	15	49984805	rs1948975	C	A	1.2063	9.779e-07	0.0679
	15	49861226	rs12594670	G	A	1.184	9.826e-07	0.4561
	4	29369145	rs73224896	A	T	1.5588	9.969e-07	0.1615
	15	49991712	rs34941109	G	A	1.2067	1.011e-06	0.0685
	6	32628342	rs9273500	A	G	0.7857	1.015e-06	0.7949
	15	49869576	rs12148716	T	C	1.2049	1.018e-06	0.0134
	2	72083803	rs7596953	G	A	0.737	1.151e-06	0.4264
	22	49356563	rs113959751	G	T	1.5121	1.166e-06	0.7651
	6	32422191	rs2097442	G	A	1.2355	1.223e-06	0.5521
	9	133956465	rs10901348	G	A	1.2886	1.276e-06	0.8815
	2	27857992	rs4666009	T	A	0.8454	1.352e-06	0.6687
	6	32635312	rs9274579	A	G	0.7993	1.371e-06	0.444
	2	72083780	rs7596753	C	A	0.7378	1.4e-06	0.3733
	2	27857517	rs1528402	G	A	0.846	1.526e-06	0.6457
	2	27855924	rs6547741	G	A	0.8461	1.534e-06	0.6474
	2	27856495	rs4666007	T	C	0.8462	1.553e-06	0.6488
	2	27859926	rs56001553	C	T	1.182	1.674e-06	0.665
	2	27794233	rs10205364	C	T	0.8473	1.69e-06	0.7599
	2	27801403	rs1919125	C	G	0.8478	1.692e-06	0.7399
	2	27801418	rs1919126	C	A	1.1794	1.747e-06	0.7231
	2	27777904	rs6750943	T	G	0.8466	1.753e-06	0.7462
	2	27830990	rs6547734	G	T	0.8473	1.768e-06	0.7205
	2	27854369	rs6547740	G	A	0.8469	1.771e-06	0.6308
	6	31785228	rs506770	G	C	1.2434	1.771e-06	0.9065
	15	49749735	rs11639111	C	T	1.1843	1.795e-06	0.1706
	2	27816989	rs4665997	T	C	0.8477	1.814e-06	0.7176
	6	32680122	rs3135461	G	A	1.2434	1.926e-06	0.4488
	2	27824940	rs7604798	T	C	0.8479	1.932e-06	0.7014
	6	32634103	rs796429679	I	D	0.8512	1.953e-06	0.0894
	2	27796526	rs10165098	C	T	0.8483	1.962e-06	0.7428
	15	49789413	rs12050614	C	T	1.1825	1.976e-06	0.112
	2	27783418	rs6547709	G	A	0.8476	2.002e-06	0.6992
	15	50004817	rs7178146	G	C	1.2004	2.029e-06	0.1648
	2	27774924	rs1820297	A	G	0.8473	2.039e-06	0.7314
	2	27813827	rs4665995	T	G	0.8485	2.041e-06	0.7258
	2	27846603	rs1528404	T	C	0.8478	2.089e-06	0.6989
	2	27778091	rs6706610	G	A	0.8476	2.09e-06	0.733
	15	49836867	rs12593917	G	T	1.1814	2.095e-06	0.0991
	2	27807624	rs13026621	G	A	0.8488	2.096e-06	0.7208
	2	27814343	rs4665996	T	C	0.8487	2.132e-06	0.7105
	2	27856793	rs2384659	G	A	0.848	2.165e-06	0.6302
	15	49992814	rs690765	T	G	0.835	2.18e-06	0.1732
	9	22071750	rs4451405	G	A	1.1813	2.225e-06	0.2875
	9	14533584	rs10961555	G	C	0.8174	2.257e-06	0.5504
	2	27834444	rs4665999	T	C	0.8487	2.273e-06	0.695
	2	27838058	rs11127071	C	A	0.8487	2.313e-06	0.6955
	2	27839107	rs6737921	T	C	0.8488	2.328e-06	0.6956
	2	27841305	rs6756238	G	A	0.8488	2.349e-06	0.6962
	6	32583328	rs9271344	T	C	1.2043	2.356e-06	0.3948
	6	32625026	rs924028642	G	A	1.2356	2.378e-06	0.4291
	11	18431377	rs78515595	T	C	1.2386	2.386e-06	0.6077
	11	18429991	rs35292478	A	C	1.238	2.394e-06	0.6086
	2	27847364	rs2384654	C	T	0.8489	2.448e-06	0.6753
	11	5796762	rs7110476	A	G	0.8203	2.771e-06	0.8312
	9	22064391	rs8181050	G	A	1.18	2.81e-06	0.3687
	2	27787540	rs12714204	T	C	0.8494	2.863e-06	0.5851
	2	27757150	rs4665381	A	C	0.8485	2.882e-06	0.7178
	2	27767107	rs1972669	T	G	0.849	2.897e-06	0.7081
	15	49868818	rs62021589	T	G	1.182	2.908e-06	0.0853
	6	32614749	rs17612489	T	A	1.2107	2.915e-06	0.5504
	2	27937807	rs7562914	C	A	1.177	3.001e-06	0.8608
	9	133953983	rs73658919	A	G	1.2916	3.099e-06	0.7155
	11	18415330	rs34740438	C	A	1.2305	3.143e-06	0.7752
	2	27833752	rs6718128	C	T	0.8506	3.2e-06	0.8977
	2	27920064	rs9941696	C	T	1.1753	3.287e-06	0.9003
	2	27915659	rs7586655	A	G	1.1753	3.328e-06	0.8212
	15	49716845	rs16962440	A	G	1.1736	3.331e-06	0.0899
	6	32678206	rs3129726	G	A	1.2352	3.357e-06	0.5952
	9	22061614	rs1537378	A	G	1.1785	3.358e-06	0.3525
	6	32628103	rs9273480	A	G	1.2228	3.401e-06	0.7178
	22	21147077	rs79462859	G	A	2.0309	3.41e-06	0.7714
	2	27768808	rs1080060	T	A	0.8501	3.443e-06	0.6964
	2	27768072	rs4493210	G	T	0.85	3.447e-06	0.6956
	2	27804432	rs28381983	T	C	0.8516	3.448e-06	0.9205
	16	54042041	rs8049988	A	G	1.2175	3.49e-06	0.5933
	8	106564652	rs28416651	G	A	1.174	3.514e-06	0.5274
	20	61295254	rs111332410	C	T	1.4596	3.547e-06	0.0205
	2	27815278	rs6738089	A	G	0.8513	3.555e-06	0.6377
	2	27772879	rs6749052	A	T	0.8505	3.576e-06	0.6975
	2	27855239	rs4666005	A	G	0.8509	3.61e-06	0.6379
	2	27852637	rs6547738	A	G	0.8509	3.613e-06	0.6384
	6	32602482	rs3104369	A	G	0.8195	3.642e-06	0.4241
	2	27828292	rs62138969	G	A	0.8513	3.664e-06	0.6451
	6	31322559	rs2523608	G	A	0.8429	3.669e-06	0.8812
	2	72093666	rs1563738	C	G	0.7462	3.681e-06	0.2595
	15	49712941	rs34813196	C	T	1.1729	3.767e-06	0.0718
	11	18397146	rs78950598	G	A	1.2369	3.792e-06	0.7331
	6	32624038	rs533155786	C	T	1.2324	3.894e-06	0.6087
	9	133952024	rs928674	A	G	1.279	3.992e-06	0.9721
	11	18404299	rs78098319	G	A	1.2321	4.002e-06	0.6825
	4	100248642	rs145452708	G	C	0.5177	4.088e-06	0.3618
	6	32674059	rs3134968	A	G	0.8361	4.118e-06	0.9258
	2	27794150	rs4260197	C	G	0.8521	4.139e-06	0.6523
	4	29429804	rs73226808	C	T	1.5263	4.15e-06	0.0512
	9	133959740	rs72768534	G	C	1.2713	4.187e-06	0.8709
	2	27755168	rs4665986	G	A	0.8507	4.207e-06	0.7488
	2	27851120	rs12615690	T	C	0.8518	4.214e-06	0.6101
	9	133959518	rs72768533	C	G	1.2712	4.215e-06	0.8666
	15	49735665	rs12916839	C	T	1.1791	4.329e-06	0.0146
	9	133947345	rs7858204	G	A	1.2878	4.35e-06	0.8878
	2	27848586	rs4666003	A	C	0.8522	4.405e-06	0.624
	2	27848397	rs4665384	A	G	0.8522	4.41e-06	0.6241
	2	27847606	rs6749426	T	C	0.8522	4.431e-06	0.6256
	6	10416134	rs1051512	C	T	1.7163	4.452e-06	0.1113
	11	18422487	rs6498	C	A	1.2288	4.46e-06	0.7362
	4	100249726	rs138495951	G	A	0.5192	4.478e-06	0.3872
	15	49744567	rs11634786	T	C	0.8531	4.491e-06	0.0765
	9	133947180	rs7875478	A	T	1.2862	4.503e-06	0.9068
	2	27778010	rs6761095	G	T	0.8518	4.519e-06	0.6477
	2	27893670	rs13033077	T	C	1.1724	4.554e-06	0.7812
	6	32626040	rs4713570	C	T	1.2297	4.554e-06	0.829
	6	32625209	rs941707873	C	T	1.2119	4.605e-06	0.2477
	17	3839874	rs35334668	A	G	1.2989	4.729e-06	0.8715
	11	18411497	rs73434674	C	A	1.227	4.818e-06	0.7392
	11	18410861	rs113003553	T	C	1.2272	4.827e-06	0.7384
	13	75903368	rs8002811	G	T	1.311	4.853e-06	0.1385
	15	96863169	rs2398180	C	T	1.1851	4.93e-06	0.6633
